# Supplementary material
Source: Springer Nature journal article supplement (https://www.springermedizin.de/resource/supplementary/12885_2009_1768_MOESM10_ESM.pdf/9472888)

**a**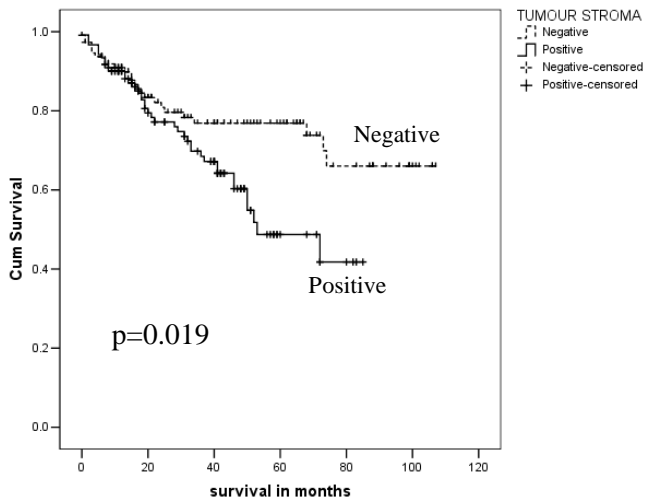**b**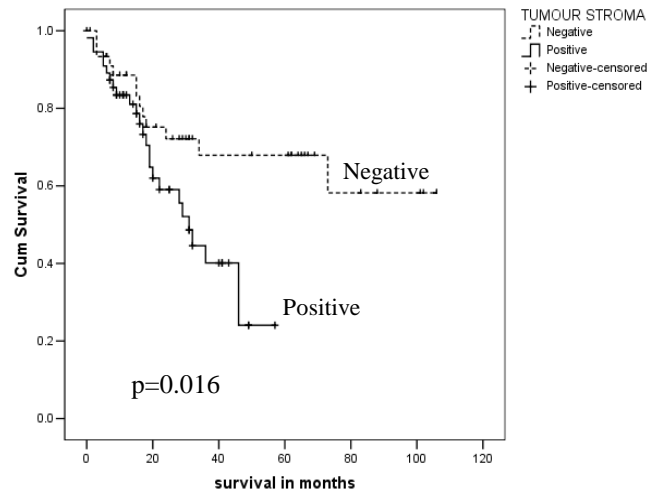**c**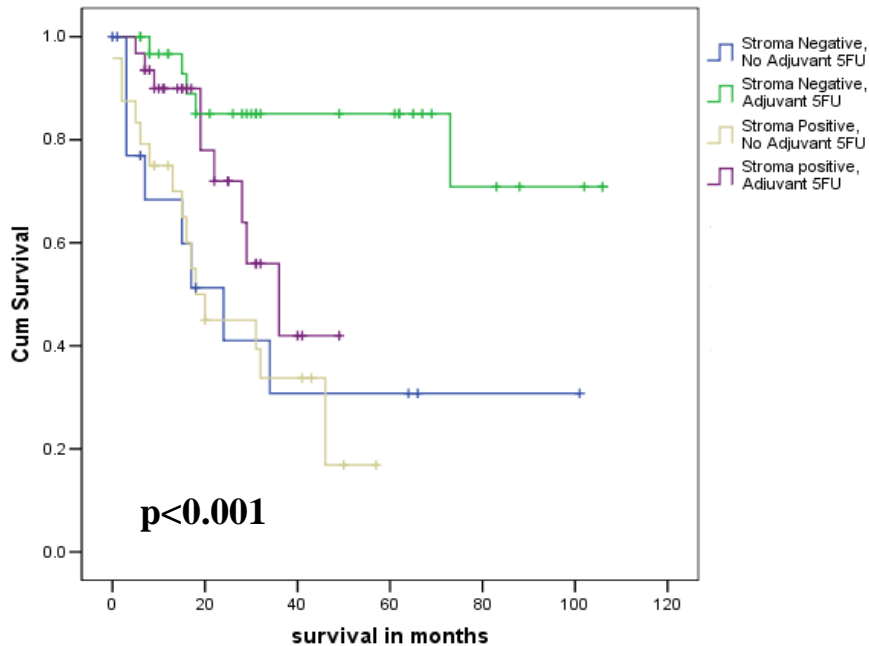

Supplement: MOESM10 [file 9472888]
